# Supplementary material for: GDF-15 plasma levels in chronic obstructive pulmonary disease are associated with subclinical coronary artery disease
Source: Respir Res. 2017 Feb 28;18:42. doi: 10.1186/s12931-017-0521-1 (PMC5331711; doi:10.1186/s12931-017-0521-1)
Supplement: Additional file 1: Tables S1-S3. — ﻿Table S1﻿﻿.﻿ ﻿Lack of association of GDF-15 levels or CAC score with PA:A ratio*. Table S2. Bivariate and Multivariate Associations with GDF-15 among COPDGene participants with COPD (n = 694). Table S3. Multivariate models of association of GDF-15 with CAC score among different subgroups of COPDGene participants with COPD. (DOCX 33 kb) [file 12931_2017_521_MOESM1_ESM.docx]

**SUPPLEMENTAL MATERIALS**

**GDF-15 plasma levels in chronic obstructive pulmonary disease are associated
with subclinical coronary artery disease**

Carlos H. Martinez, M.D., M.P.H. 1, Christine M. Freeman, Ph.D. 1,2,Joshua D. Nelson, B.S. 1, Susan Murray, ScD 3, Xin Wang, Ph.D. 3, Matthew J. Budoff, M.D. 4,
Mark T. Dransfield, M.D. 5, 6, John E. Hokanson, Ph.D. 7, Ella A. Kazerooni, M.D., M.S. 8
Gregory L. Kinney, Ph.D. 7, Elizabeth A. Regan, M.D., Ph.D. 9, 10, J. Michael Wells, M.D. 5, 6, Fernando J. Martinez, M.D., M.S. 11, MeiLan K. Han, M.D., M.S. 1,
Jeffrey L. Curtis, M.D. 1, 12, 13 for the COPDGene Investigators.

1 Division of Pulmonary & Critical Care Medicine, University of Michigan Health System, Ann Arbor, MI

2 Research Service, VA Ann Arbor Healthcare System, Ann Arbor, MI

3 Department of Biostatistics, School of Public Health, University of Michigan, Ann Arbor, MI

4 Los Angeles Biomedical Research Institute at Harbor-UCLA Medical Center, Torrance, CA

5 The Lung Health Center, Division of Pulmonary, Allergy & Critical Care Medicine, University of Alabama at Birmingham, Birmingham, AL

6 Medical Service, Birmingham Veteran Affairs Medical Center, Birmingham, AL

7 School of Public Health, University of Colorado, Aurora, CO

8 Radiology Department, University of Michigan Health System, Ann Arbor, MI

9 National Jewish Health & Research Center, Denver, CO

10 Pulmonary & Critical Care Medicine Division, Department of Medicine, University of Colorado, Denver, CO

11 Pulmonary & Critical Care Medicine Division, Department of Medicine, Weill Cornell Medical College, New York, NY

12 Graduate Program in Immunology, University of Michigan, Ann Arbor, MI

13 Medical Service, VA Ann Arbor Healthcare System, Ann Arbor, MI

**Corresponding author**:

Jeffrey L. Curtis, M.D.

Pulmonary & Critical Care Medicine Section (506/111G)

VA Ann Arbor Healthcare System
2215 Fuller Road; Ann Arbor, MI 48105-2303, U.S.A.

E-mail: [jlcurtis@umich.edu](mailto:jlcurtis@umich.edu)

**Additional file 1: Table S1.**  Lack of association of GDF-15 levels or CAC score with PA:A ratio*.

|  | Risk Ratio | 95% CI | p-value |
| --- | --- | --- | --- |
| GDF-15 to PA:A ratio |  |  |  |
| Ratio (by one unit increment) | 0.28 | 0.07, 1.09 | 0.06 |
| Ratio ≥1 (versus <1) | 0.87 | 0.57, 1.33 | 0.52 |
| CAC to PA:A ratio |  |  |  |
| Ratio (by one unit increment) | 0.27 | 0.05, 1.51 | 0.13 |
| Ratio ≥1 (versus <1) | 0.71 | 0.42, 1.21 | 0.20 |

*, PA:A, ratio of the diameter of the pulmonary artery to diameter of the aorta as measured on CT scan [1](#_ENREF_1).

**Additional file 1: Table S2**. Bivariate and Multivariate Associations with GDF-15 among COPDGene participants with COPD (n=694).

|  | Bivariate | Multivariate* |
| --- | --- | --- |
| By 10-year coronary heart disease risk group& |  |  |
| Low (<10%) | Ref. | Ref. |
| Intermediate (10%-20%) | 1.74 (1.28, 2.35) | 1.57 (1.15, 2.15) |
| High (>20%) | 4.37 (2.85, 6.68) | 4.23 (2.70, 6.63) |
| Sociodemographics |  |  |
| Age (per year increment) | 1.08 (1.06, 1.10) | 1.09 (1.07, 1.12) |
| Females (Reference is Male) | 0.74 (0.56, 0.98) | 0.80 (0.59, 1.09) |
| African American (Reference is Non-Hispanic White) | 0.63 (0.43, 0.91) | 0.75 (0.48, 1.15) |
| Respiratory status |  |  |
| Spirometry GOLD stage IV  (Reference is GOLD II-III) | 0.84 (0.62, 1.12) | 0.92 (0.65, 1.31) |
| Pack-years smoked (per 10 pack-year increment) | 1.11 (1.05, 1.18) | 1.03 (0.97, 1.10) |
| ≥2 exacerbation per annum (Reference 0-1) | 0.85 (0.62, 1.17) | 1.04 (0.73, 1.50) |
| Chronic bronchitis present (Reference is absent) | 1.05 (0.77, 1.43) | 0.97 (0.68, 1.37) |
| Emphysema >10% | 0.81 (0.61, 1.07) | 0.88 (0.62, 1.24) |
| Higher tertile of airway thickness | 1.34 (0.93, 1.93) | 1.33 (0.89, 1.97) |
| Other co-morbidities (%) |  |  |
| Asthma | 0.70 (0.51, 0.97) | 0.92 (0.64, 1.32) |
| GERD | 0.88 (0.65, 1.19) | 0.89 (0.64, 1.24) |
| Mobility-related diseases | 1.14 (0.85, 1.52) | 1.01 (0.74, 1.39) |
| Individual cardiovascular risk factors£ |  |  |
| Obesity (BMI ≥30) | 1.17 (0.87, 1.59) | 1.02 (0.73, 1.45) |
| Diabetes | 5.85 (3.28, 10.43) | 5.49 (2.95, 10.22) |
| Currently smoking | 1.05 (0.78, 1.42) | 1.94 (1.31, 2.89) |
| Hypertension | 1.63 (1.24, 2.15) | 1.24 (0.89, 1.66) |
| Hyperlipidemia | 1.50 (1.13, 1.99) | 1.04 (0.75, 1.43) |

All entries represent OR and its 95% CI, based on ordinal logistic regression.

*Multivariate model includes all variables listed in the table, unless otherwise explained.

&Based on the HEART score, as described in the Methods section.

£From a separate model replacing HEART score by its individual components.

**Additional file 1: Table S3**. Multivariate models of association of GDF-15 with CAC score among different subgroups of COPDGene participants with COPD.

|  | Restricted to participants with | | | |
| --- | --- | --- | --- | --- |
|  | Less airway disease  (n=567) | Emphysema >10%  (n=389) | GOLD 2-3 spirometry  (n=389) | FEV1 ≥1.0 L  (n=398) |
| GDF-15 level (in tertiles) | |  |  |  |
| Lower tertile | Ref. | Ref. | Ref. | Ref. |
| Intermediate tertile | 1.64 (1.14, 2.38) | 1.85 (1.19, 2.88) | 1.42 (0.61, 3.34) | 1.22 (0.49, 3.07) |
| Higher tertile | 2.59 (1.73, 3.88) | 2.95 (1.83, 4.77) | 3.09 (1.38, 6.95) | 2.60 (1.08, 6.25) |

All entries represent OR and its 95% CI, based on ordinal multinomial logistic regression models.

All models additionally adjusted for race, GOLD spirometry stage, pack-years smoked, chronic bronchitis symptoms, history of exacerbations, and co-morbidities (asthma, GERD, mobility-related diseases).

# Reference

1 Wells JM, Washko GR, Han MK, et al. Pulmonary arterial enlargement and acute exacerbations of COPD. *N Engl J Med* 2012; 367:913-921.
